# Supplementary material
Source: PubMed Central journal article supplement (PMC3504761)
Supplement: supp_M112.418392_jbc.M112.418392-1.pdf [file supp_M112.418392_jbc.M112.418392-1.pdf]

## Supplemental Data

### Post-Translational S-nitrosylation is an Endogenous Factor Fine-Tuning Human S100A1 Protein

#### Properties

Martina Lenarčič Živković, Monika Zaręba-Koziol, Liliya Zhukova, Jaroslaw Poznański, Igor Zhukov, and Aleksandra Wyslouch-Cieszyńska

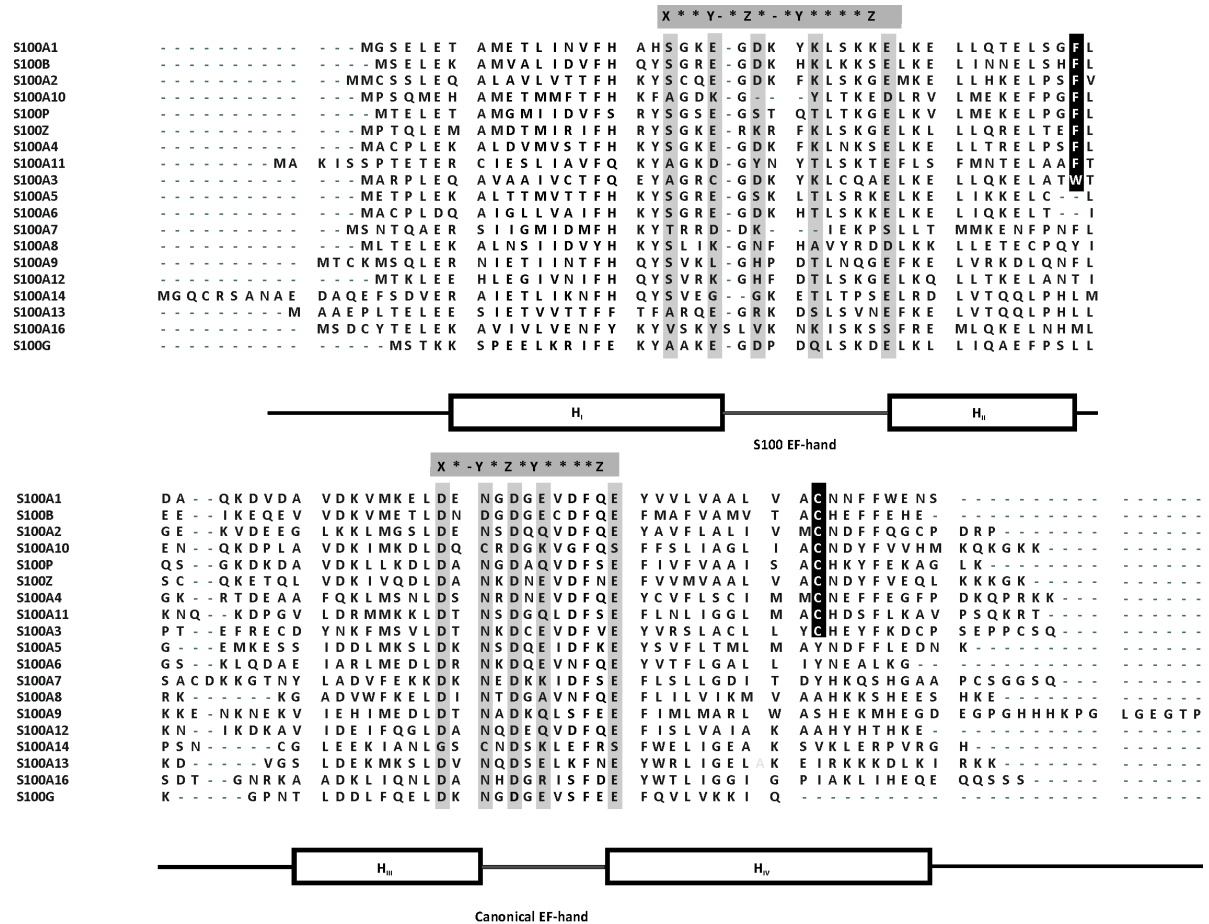

**Figure S1.** Alignment of human S100 proteins. Comparison of human S100A1 with other S100 family members to present the subgroup of proteins with conserved C-terminal cysteine residues and an aromatic residue in the linker region (shaded dark grey). Residues responsible for Ca<sup>2+</sup> coordination in the EF-hand loops are marked light grey.

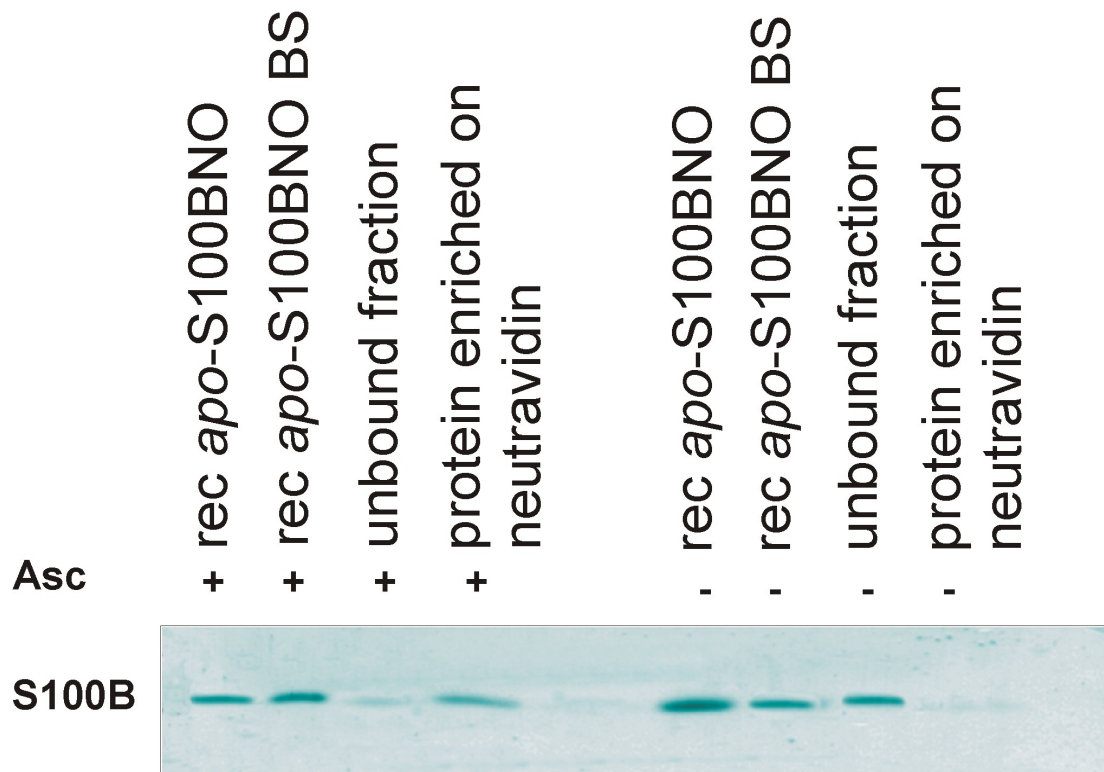

**Figure S2. Biotin Switch method control experiment: Western blot detection of S-nitrosylation of recombinant chemically S-nitrosylated S100B protein.** S-nitrosylated S100B protein is highly enriched on neutravidin (lane 4) using the Biotin Switch method. If the S-NO bond is not reduced using ascorbate solution the protein is found in the unbound fraction (lane 7) Lane 1: chemically S-nitrosylated, recombinant human S100B-NO protein solution before BSM (rec *apo*-S100B-NO); lane 2: rec *apo*-S100B solution after BS protocol before affinity chromatography (rec *apo*-S100B-NO BS); lane 3: rec *apo*-S100B after full BS unbound to neutravidin; lane 4: S100B-NO bound to neutravidin after BS; lane 5: rec *apo*-S100B -NO protein solution before BSM without ascorbate (Asc) reduction of S-NO bond; lane 6: rec *apo*-S100B-NO solution after BS protocol without Asc reduction; lane 7: rec *apo*-S100B-NO after BS without Asc fraction unbound to neutravidin; lane 8: S100B-NO bound to neutravidin (control BS without Asc); chemically S-nitrosylated, recombinant human S100B-NO protein eluted from neutravidin resin after full BS (rec *apo*-S100B-NO BS ); lane 5: protein fraction unbound to neutravidin (full BS); lane 6: wash fraction (control BS without Asc); lane 7: wash fraction (full BS); lane 8: proteins enriched on neutravidin resins (control BS without Asc); lane 9: proteins enriched on neutravidin resins (full BS). BS, Biotin Switch method; Asc, ascorbate.

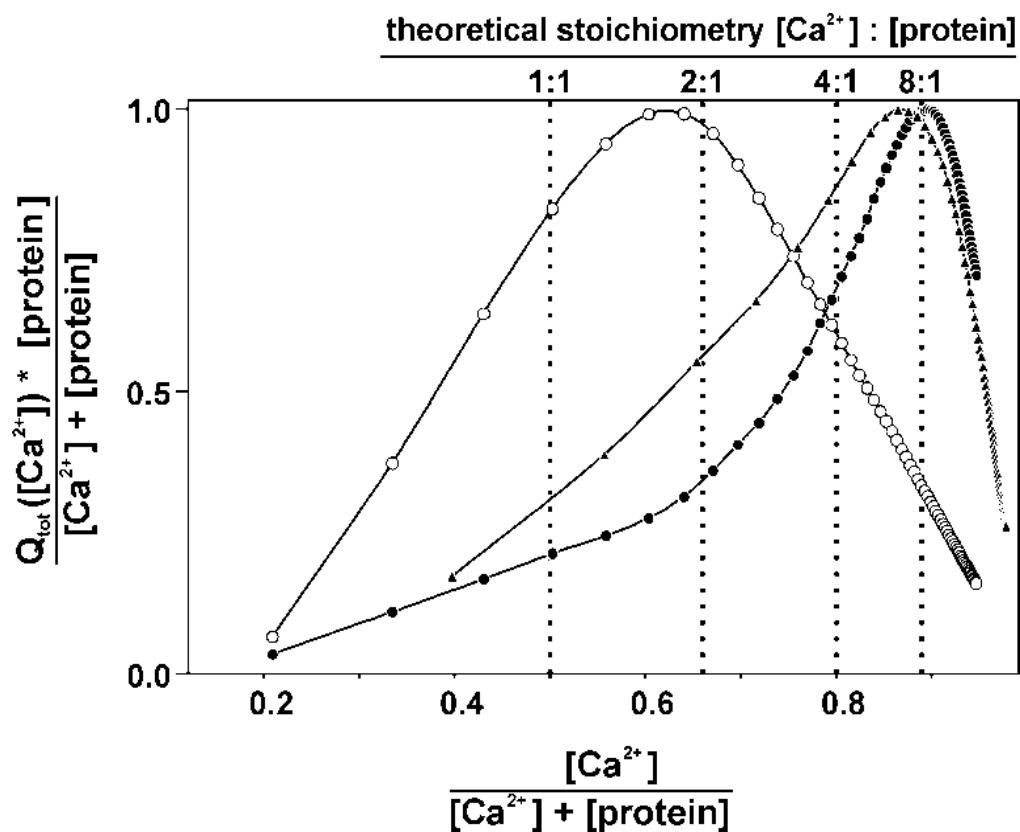

**Figure S3.** Stoichiometry of the S100A1 /  $Ca^{2+}$  complex. Job plots for the renormalized cumulative heat flow upon titration with  $Ca^{2+}$  ions at low-salt for 100  $\mu M$  apo-S100A1 (empty circles) and at 150 mM ionic strength for 40  $\mu M$  S100A1 (solid circles) and S100-NO (solid triangles). The locations of the individual maximum roughly correspond to the binding stoichiometries.

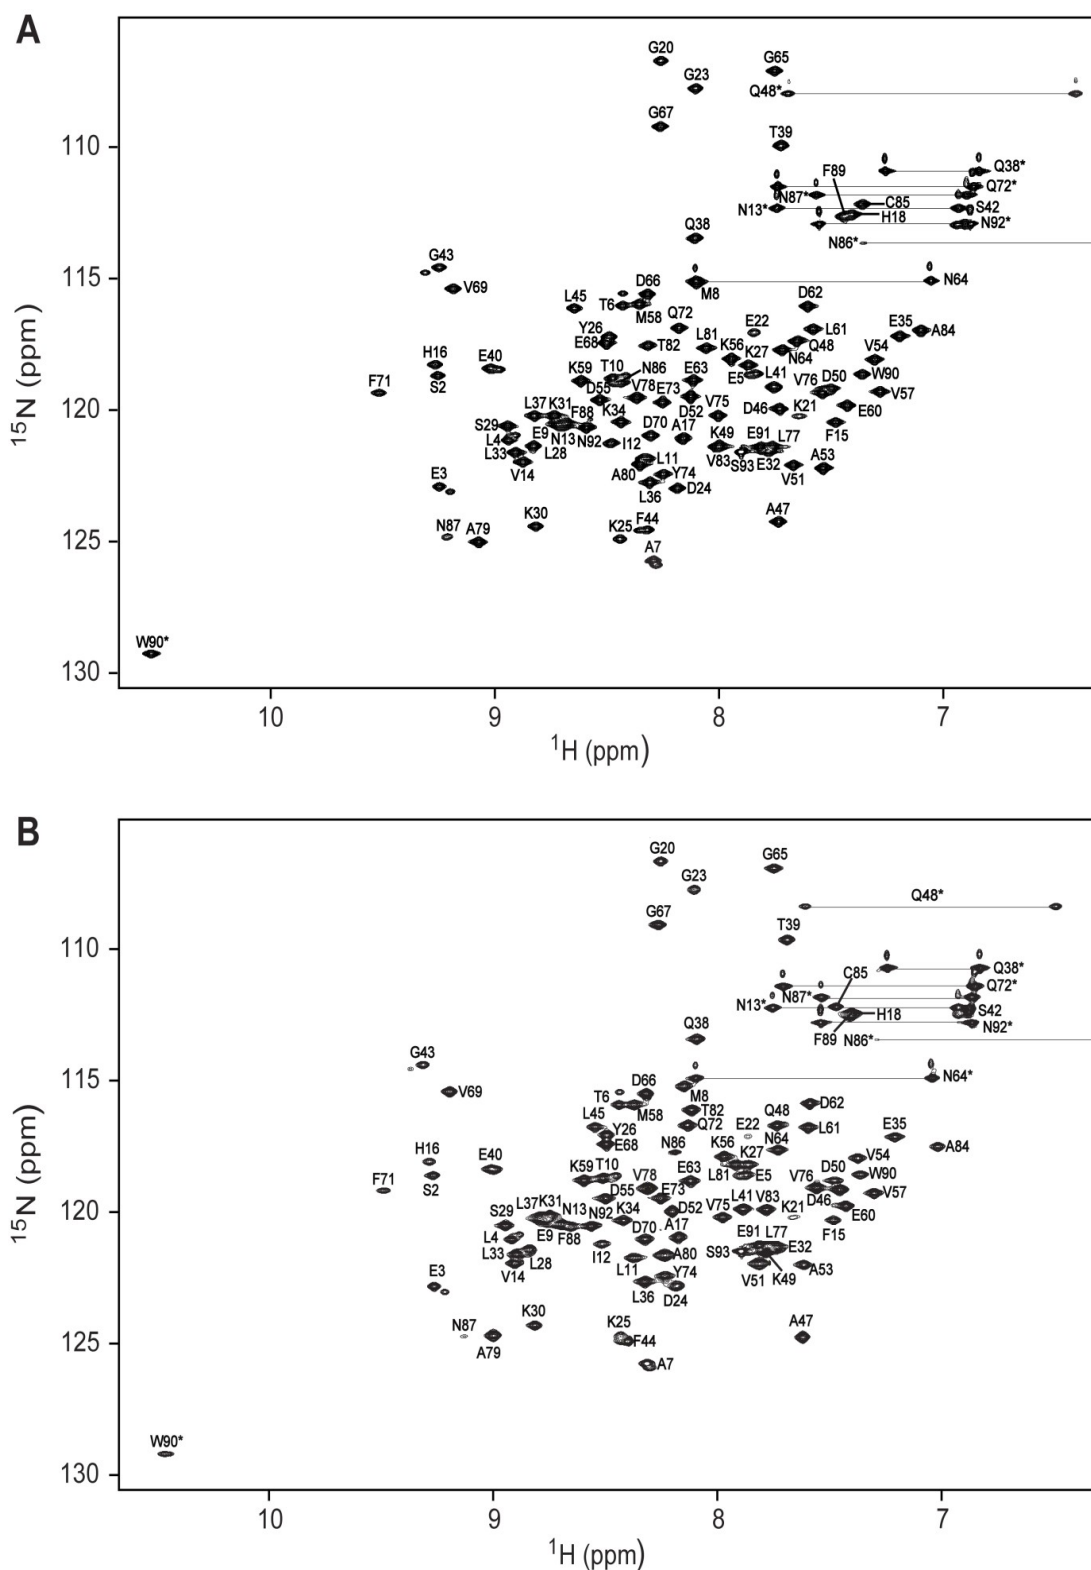

**Figure S4.** 2D  $^1\text{H}$ - $^{15}\text{N}$  HSQC spectra for *apo*-S100A1 (A) and *apo*-S100A1-NO (B) recorded at 278 K on Varian VNMRS 800 NMR spectrometer. The backbone sequence-specific are shown by one-letter code and sequence number.

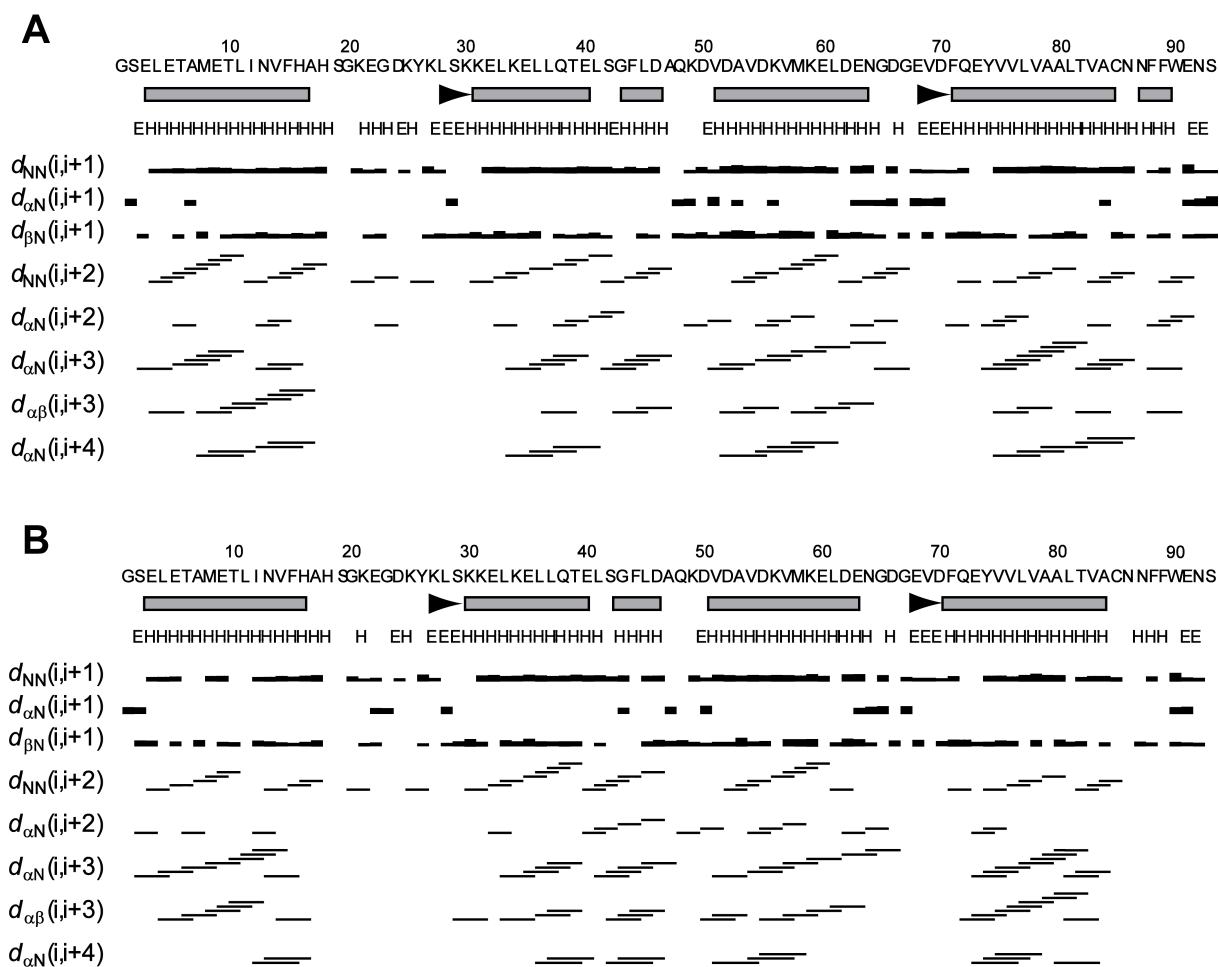

**Figure S5.** NOE patterns for *apo*-S100A1 (A) and *apo*-S100A1-NO (B) proteins. Grey rectangles indicate  $\alpha$ -helical secondary structure elements,  $\beta$ -strands are marked with black arrowheads. The H (helix) and E (extended) shows the backbone conformation predicted as 'good' on base  $^1\text{H}$ ,  $^{13}\text{C}$ , and  $^{15}\text{N}$  chemical shifts with TALOS+ software.

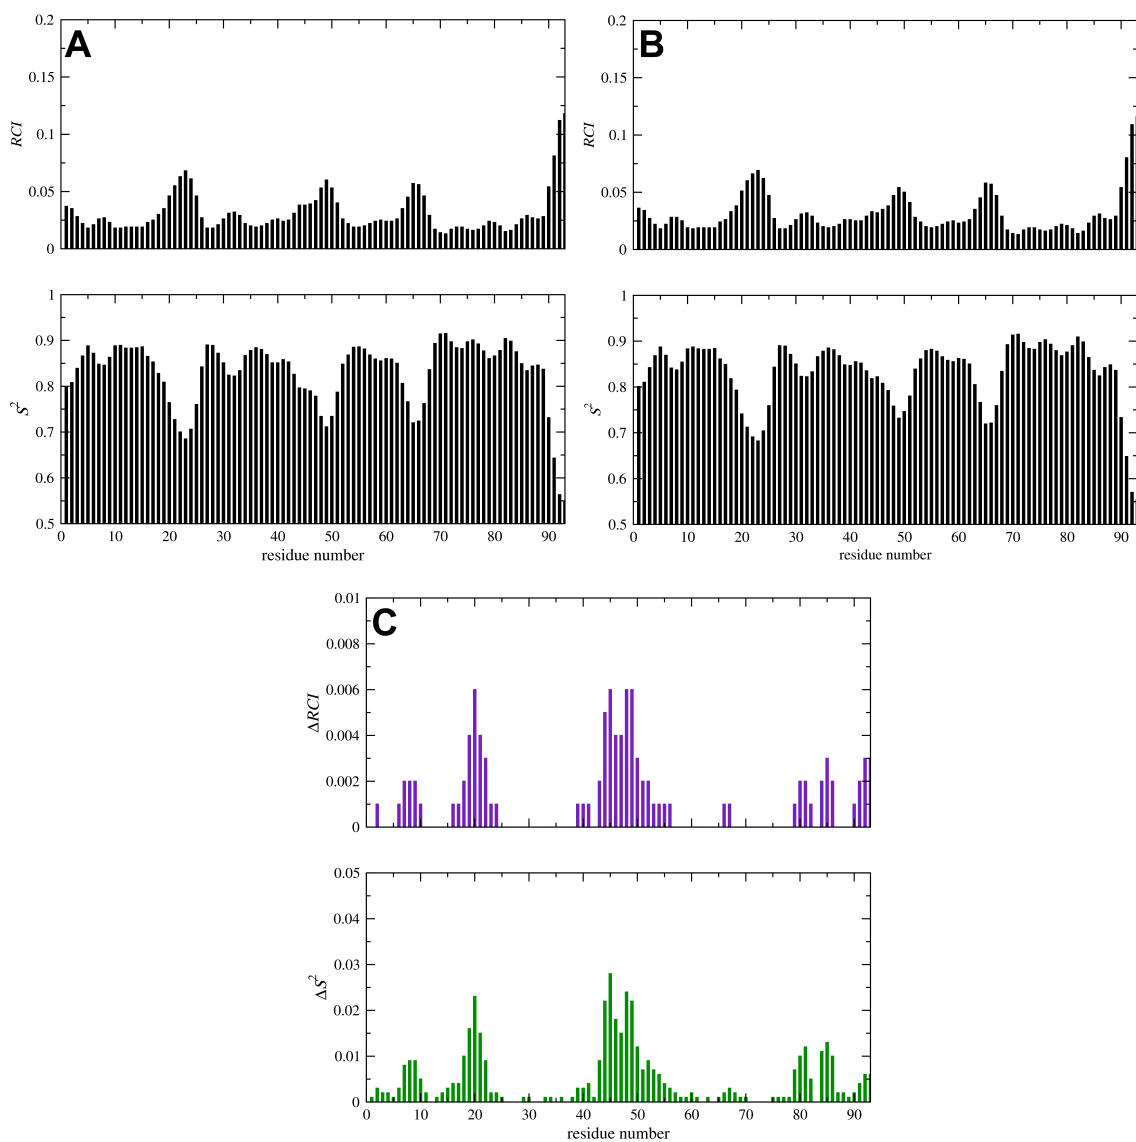

**Figure S6.** The Random Coil Index (RCI) analysis for reduce (A) and S-nitrosylated (B) forms of human apo-S100A1 protein. (C) presented the differences in RCI data between both variants. The data were obtained using www server: [http://wishart.biology.ualberta.ca/rci/cgi-bin/rci.cgi\\_1\\_e.py](http://wishart.biology.ualberta.ca/rci/cgi-bin/rci.cgi_1_e.py)

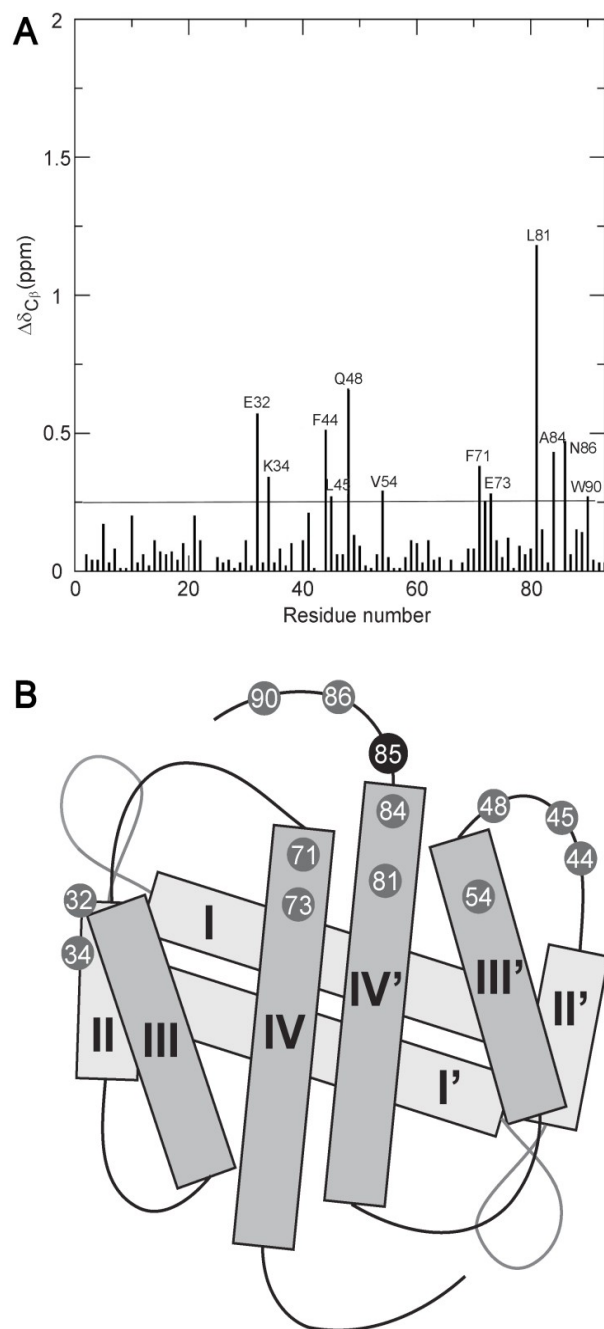

**Figure S7.** Chemical shift changes of  $^{13}\text{C}_\beta$  atoms ( $\Delta\delta_{\text{C}_\beta}$ ) as a consequence of Cys85 *S*-nitrosylation. **(A)**  $\Delta\delta_{\text{C}_\beta}$  between *apo*-S100A1 and *apo*-S100A1-*NO* proteins were calculated as difference of chemical shifts of  $\text{C}_\beta$  atoms of individual residue. Only residues with  $\Delta\delta_{\text{C}_\beta}$  values higher than 0.25 ppm are marked. **(B)** Schematic structure of *apo*-S100A1-*NO*. Cys85-*NO* is marked as black circle, residues with  $\Delta\delta_{\text{C}_\beta} \geq 0.25$  ppm are marked with dark grey circles.

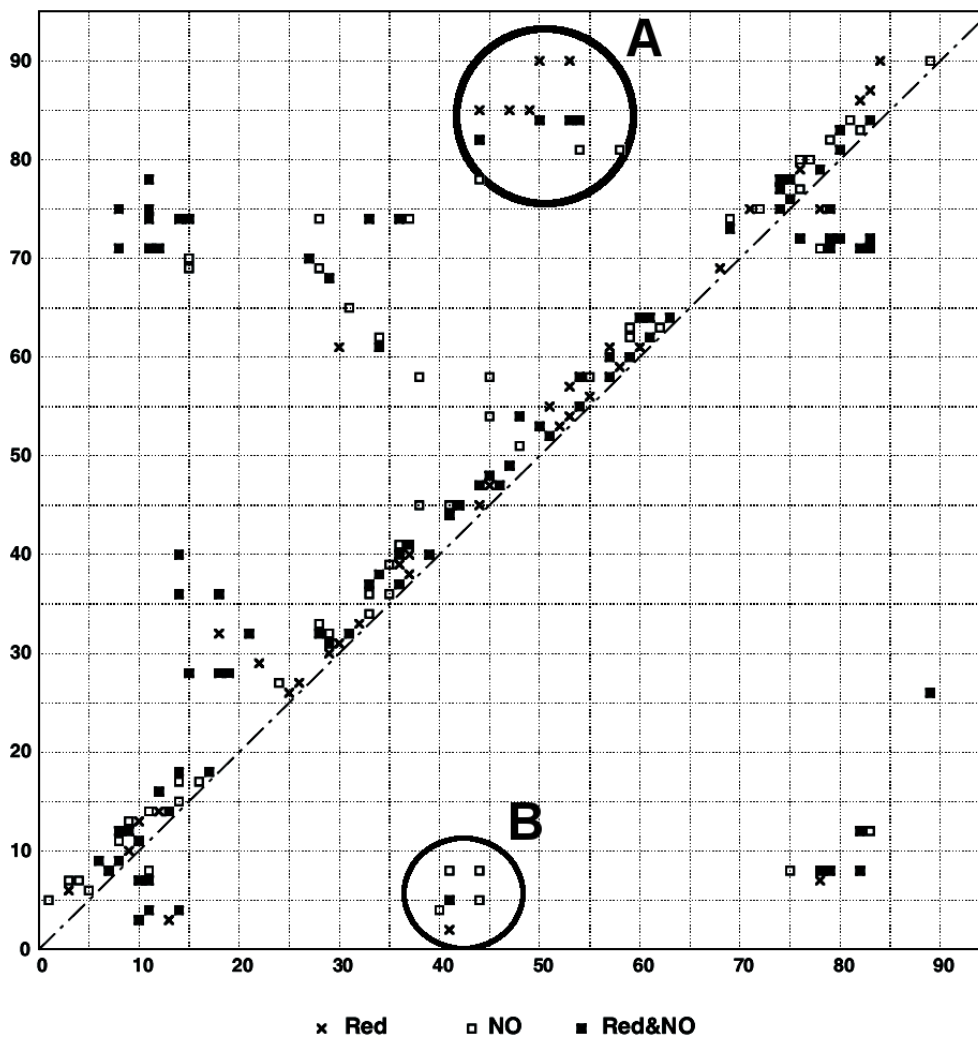

**Figure S8.** Map of NOE contacts observed between  $^1\text{H}$  located in side chains observed in reduce, and S-nitrosylated forms of human *apo*-S100A1 protein. The regions exhibited notable differences in detected NOE contacts are noted as **A** and **B**.



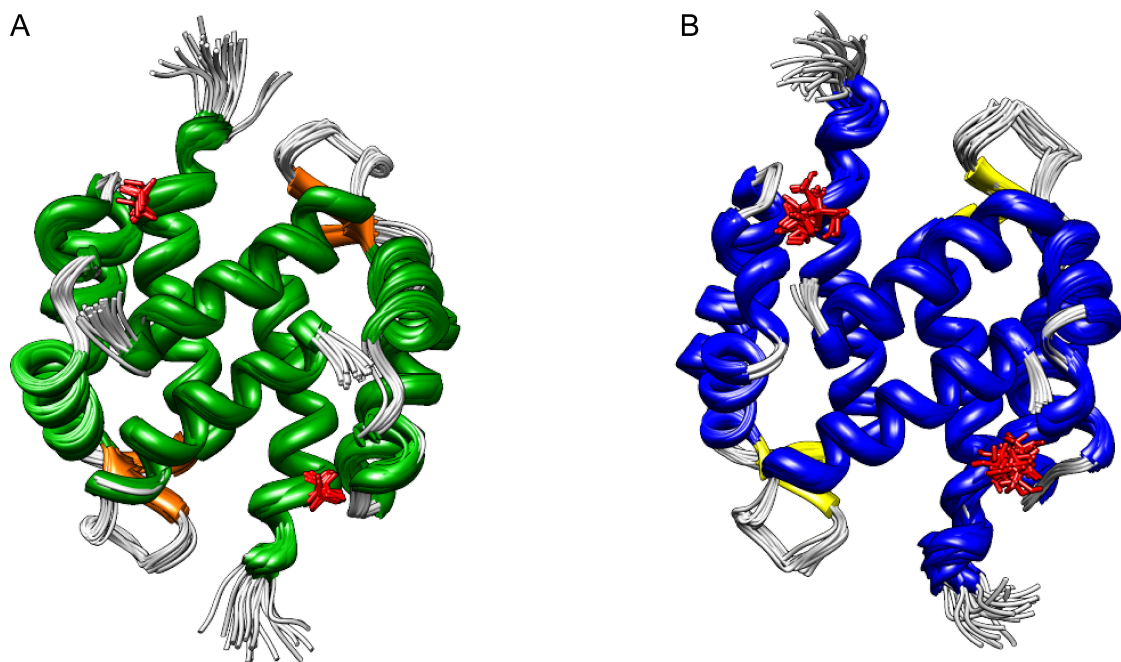

**Figure S9.** Ribbon presentation of 20 lowest energy structures of *apo*-S100A1 (A) and *apo*-S100A1-NO (B). The side-chain C-terminal Cys85 / Cys85-NO are marked with red.

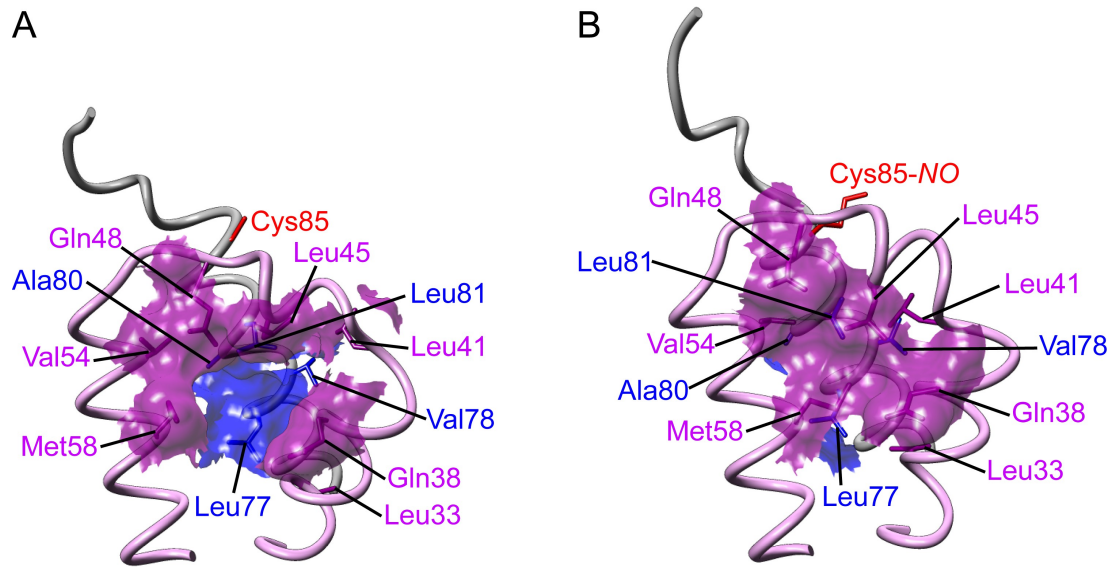

**Figure S10.** Surface presentation of helix II – helix III region for reduce (A) and S-nitrosylated (B) forms of human *apo*-S100A1 protein. The reorganization of side chains for residues Gln 38, Leu 45, and Met 58 are clearly visible.
